# Supplementary material
Source: PubMed Central journal article supplement (PMC4356832)
Supplement: AAC.04221-14_zac004153876so1.pdf [file AAC.04221-14_zac004153876so1.pdf]

**Table S1.** 12 loci MIRU-VNTR typing of 80 *M. tuberculosis* Beijing genotype isolates from Russian TBS patients

| MIRU<br>- type<br>* | MIT **  | MIRU12- profile | No of<br>isolates,<br>this<br>study | Drug resistance*** |     | MIRU-type in the<br>Beijing database*,<br>Russia, % in the local<br>Beijing population | MIRU-type in the<br>Beijing database*, FSU,<br>% in the local Beijing<br>population | MIRU-type in the Beijing<br>database*, mainly East<br>Asia and ROW, % in the<br>local Beijing population                                                                                                                            |
|---------------------|---------|-----------------|-------------------------------------|--------------------|-----|----------------------------------------------------------------------------------------|-------------------------------------------------------------------------------------|-------------------------------------------------------------------------------------------------------------------------------------------------------------------------------------------------------------------------------------|
|                     |         |                 |                                     | Suscept.           | MDR |                                                                                        |                                                                                     |                                                                                                                                                                                                                                     |
| M2                  | MIT 16  | 223325153533    | 39                                  | 3                  | 27  | Pskov 32, St. Petersburg<br>53, Samara 58,<br>Kaliningrad 17, Ural<br>24, Irkutsk 50,  | South Ukraine 42,<br>Kyrgyzstan 73                                                  | China (Beijing 2.7,<br>Shanghai 2.7, Wuhan 3.6,<br>Henan 6.2, Hong Kong 1.6,<br>Taiwan 0.5), Japan 0.5                                                                                                                              |
| M11                 | MIT 17  | 223325173533    | 29                                  | 2                  | 26  | Pskov 27, St. Petersburg<br>21, Samara 24, Ural 56,<br>Irkutsk 26, Kaliningrad<br>65,  | South Ukraine 26,<br>Kyrgyzstan 2.6                                                 | China (Beijing 46,<br>Shanghai 12, Wuhan 13,<br>Henan 19, Hong Kong<br>31.7, Taiwan 50.8), Japan<br>24, Singapore 24.4, Laos<br>28, Mongolia 66, Vietnam<br>21, Saudi Arabia 37.9,<br>Mozambique 15, South<br>Africa 3.9, Peru 13.3 |
| M12                 | MIT 135 | 221325173533    | 5                                   |                    | 5   | Pskov 2.5, St.<br>Petersburg 2.1, Samara<br>1.6, Ural 6, Kaliningrad<br>2.5            |                                                                                     | China (Beijing 1.3,<br>Shanghai 1.3, Henan 6.2),<br>Japan 13                                                                                                                                                                        |
| M105                | MIT 642 | 223325173423    | 2                                   |                    | 2   | Irkutsk 0.8                                                                            |                                                                                     | Japan 1.1, Peru 3.3                                                                                                                                                                                                                 |
| M1                  | MIT 86  | 223325173433    | 1                                   |                    | 1   | St. Petersburg 2.1                                                                     |                                                                                     | China (Beijing 4.2,<br>Shanghai 1.2, Wuhan 1.2,                                                                                                                                                                                     |

|      |         |              |   |   |   |                                |                |                                                                                                                                 |
|------|---------|--------------|---|---|---|--------------------------------|----------------|---------------------------------------------------------------------------------------------------------------------------------|
|      |         |              |   |   |   |                                |                | Hong Kong 2.9, Taiwan 1.1), Singapore 3.1, Japan 1.7                                                                            |
| M54  | MIT 101 | 223325173523 | 1 |   | 1 | Irkutsk 0.9                    |                | China (Beijing 1.4, Henan 3.1, Hong Kong 1.6, Taiwan 2.7), Singapore 4.4, Japan 2.8, Saudi Arabia 10.3, Peru 6.7, Australia 9.1 |
| M87  | MIT 592 | 223325153433 | 1 | 1 |   | Samara 2.3, Irkutsk 0.9        | Kyrgyzstan 5.2 | China (Shanghai 3.7, Taiwan 0.5), Singapore 0.6                                                                                 |
| M89  | MIT 571 | 223325153534 | 1 | 1 |   | Pskov 7.5, Ural 2, Irkutsk 0.9 |                | Taiwan 1.1                                                                                                                      |
| M107 | MIT 706 | 223325173534 | 1 |   | 1 |                                |                | China (Beijing 2.8, Shanghai 1.2, Hong Kong 2.5, Taiwan 1.6), Japan 0.6                                                         |

\* according to our proprietary global 12-MIRU-VNTR database of Beijing genotype (Mokrousov, 2008, 2012) that currently includes data on ~3000 isolates (Mokrousov, 2015 accepted for publication).

\*\* MIT - MIRU international type, according to SITVIT\_WEB (Demay et al., 2012).

\*\*\* Drug resistance data do not include 6 phenotypically susceptible isolates with drug resistance mutations.

## References

- Demay C, Liens B, Burguière T, Hill V, Couvin D, Millet J, Mokrousov I, Sola C, Zozio T, Rastogi N.** 2012. SITVITWEB – A publicly available international multimarker database for studying *Mycobacterium tuberculosis* genetic diversity and molecular epidemiology. *Infect. Genet. Evol.* **12**:755-766.
- Mokrousov I.** 2008. Genetic geography of *Mycobacterium tuberculosis* Beijing genotype: A multifacet mirror of human history? *Infect. Genet. Evol.* **8**:777-785.
- Mokrousov I.** 2012. Human migratory history: Through the looking-glass of genetic geography of *Mycobacterium tuberculosis*. In: *Causes and Consequences of Human Migration* (Eds. M.H. Crawford and B. Campbell). Cambridge University Press. pp. 317-341.

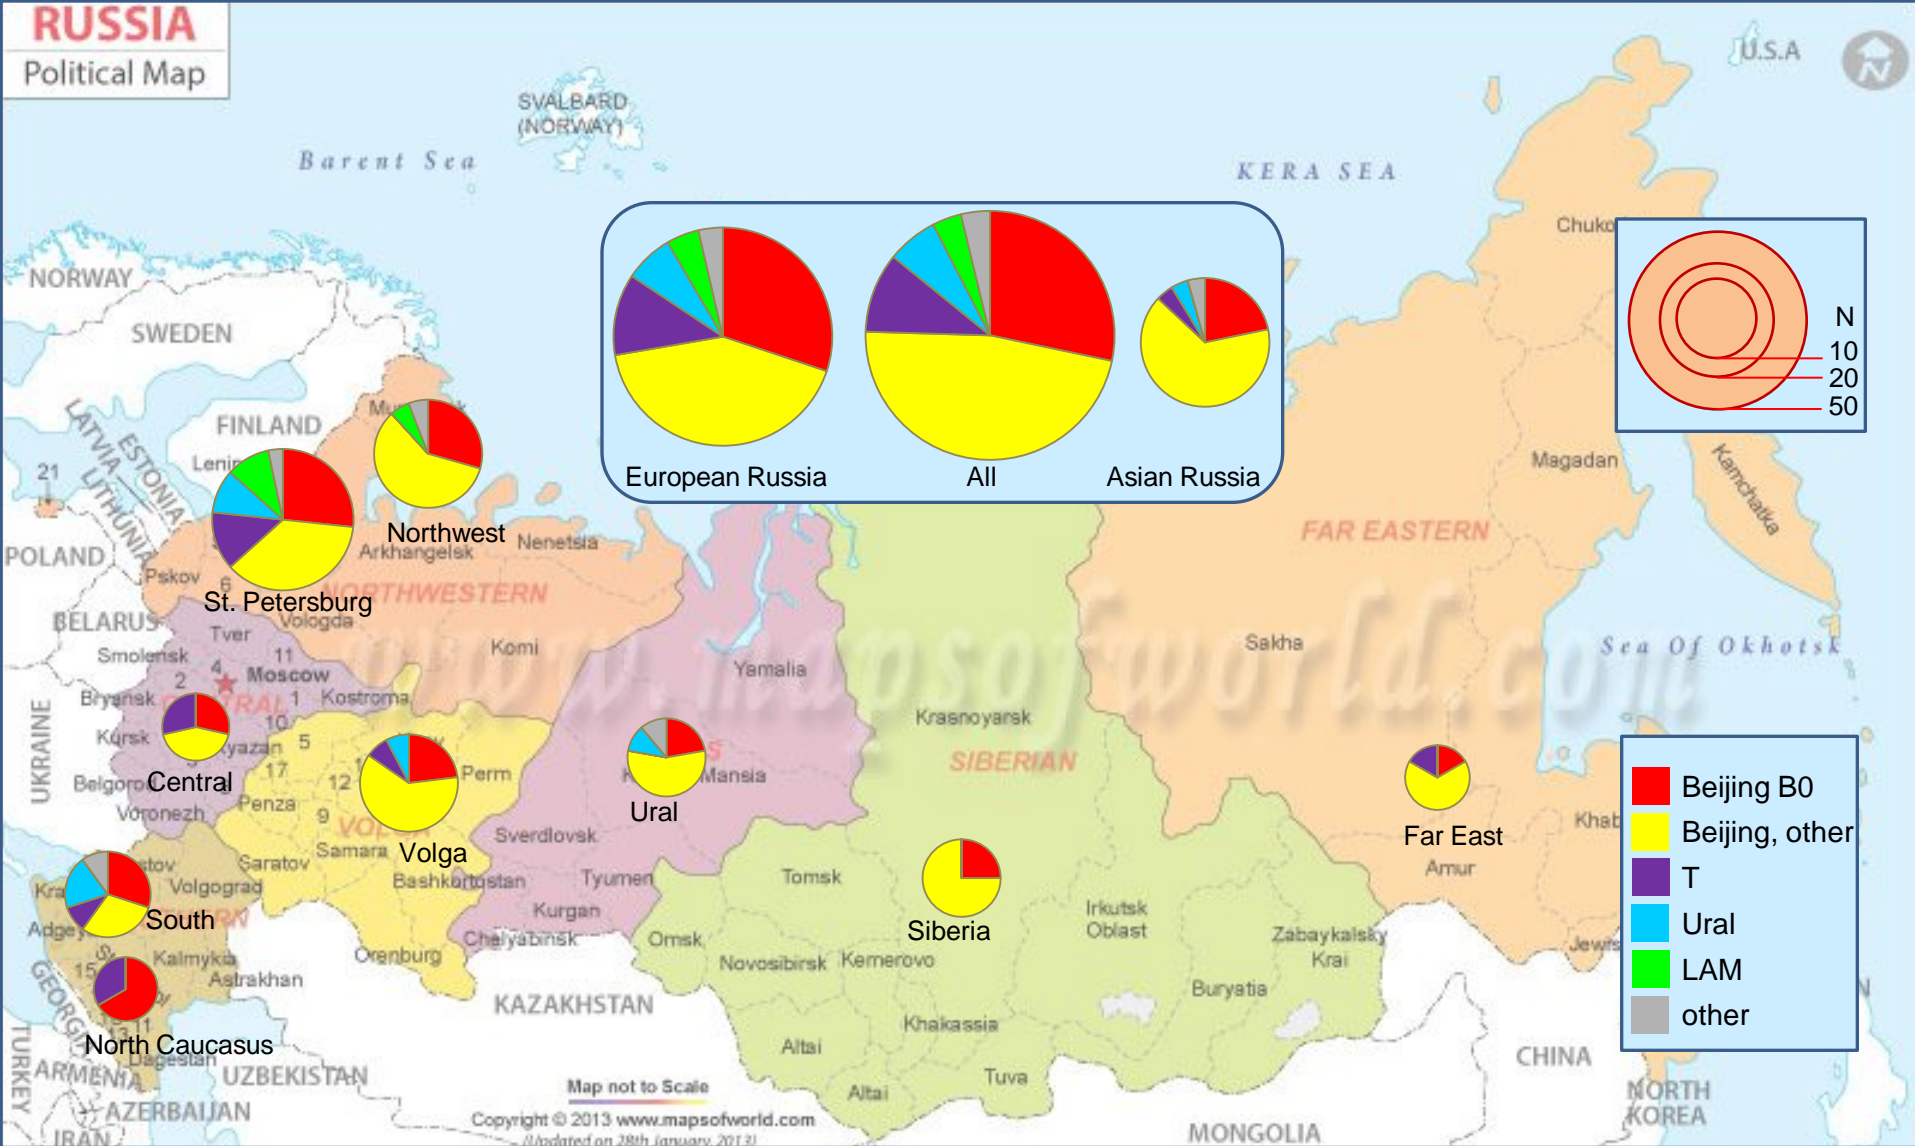

**Supporting Fig. S1.** Geographic distribution of *M. tuberculosis* genotypes identified in clinical isolates from spinal TB patients across Russia. “Asian Russia” includes Ural, Siberia and Far East.

Free map of Russia downloaded from <http://www.mapsofworld.com/russia/russia-political-map.html>
